# Supplementary material for: To Prevent Oxidative Stress, What about Protoporphyrin IX, Biliverdin, and Bilirubin?
Source: MDPI journal article supplement (doi:10.3390/antiox12091662), 2023-08-23
Supplement: s1 [file s1]

# To Prevent Oxidative Stress, What about Protoporphyrin IX, Biliverdin, and Bilirubin?

Ana Martínez <sup>1</sup>, Isabel López-Rull <sup>2</sup> and Juan A. Fargallo <sup>3</sup>

## Supplementary Material

Biliverdin (BV)

### Results

| M062x/LANL2DZ       | Neutral      | Cation       | Anion        | I    | A    | $\omega-$ | $\omega+$ |
|---------------------|--------------|--------------|--------------|------|------|-----------|-----------|
|                     | -1947.332742 | -1947.084837 | -1947.409527 | 6.75 | 2.09 | 6.69      | 2.27      |
| M062x/6-311+g(2d,p) |              |              |              |      |      |           |           |
|                     | -1948.162669 | -1947.920658 | -1948.236540 | 6.59 | 2.01 | 6.47      | 2.17      |

### Optimized Geometries

-----  
# opt freq LANL2DZ m062x  
-----

Standard orientation:

| Center<br>Number | Atomic<br>Number | Atomic<br>Type | Coordinates (Angstroms) |           |           |
|------------------|------------------|----------------|-------------------------|-----------|-----------|
|                  |                  |                | X                       | Y         | Z         |
| 1                | 8                | 0              | 4.432115                | -2.974901 | 1.487050  |
| 2                | 8                | 0              | 6.476830                | -1.182099 | 1.785697  |
| 3                | 8                | 0              | 4.782595                | -2.147544 | -0.599649 |
| 4                | 8                | 0              | 7.429972                | 0.272309  | 0.313028  |
| 5                | 8                | 0              | -4.182138               | -5.192601 | 1.849096  |
| 6                | 8                | 0              | -3.619298               | 1.931359  | -0.807607 |
| 7                | 7                | 0              | -0.039156               | -0.747762 | -0.728932 |
| 8                | 7                | 0              | 1.097347                | 1.784315  | -0.481303 |
| 9                | 7                | 0              | -2.952758               | -3.596190 | 0.633471  |
| 10               | 7                | 0              | -1.443398               | 2.758060  | -0.516899 |
| 11               | 6                | 0              | 1.197315                | -2.557775 | -1.249515 |
| 12               | 6                | 0              | 1.254956                | -1.164837 | -0.997073 |
| 13               | 6                | 0              | 3.434809                | 1.938978  | -0.370924 |
| 14               | 6                | 0              | 2.294327                | 1.064615  | -0.644441 |
| 15               | 6                | 0              | -0.162289               | -2.955844 | -1.141222 |
| 16               | 6                | 0              | 2.915492                | 3.172200  | -0.044761 |
| 17               | 6                | 0              | -0.914497               | -1.799186 | -0.802065 |
| 18               | 6                | 0              | 2.360709                | -0.278668 | -0.950480 |
| 19               | 6                | 0              | 2.364822                | -3.458746 | -1.558656 |
| 20               | 6                | 0              | 1.454027                | 3.038051  | -0.138647 |

|    |   |   |           |           |           |
|----|---|---|-----------|-----------|-----------|
| 21 | 6 | 0 | 4.852769  | 1.440671  | -0.334784 |
| 22 | 6 | 0 | 3.125741  | -3.921662 | -0.292227 |
| 23 | 6 | 0 | -0.715486 | -4.317055 | -1.469420 |
| 24 | 6 | 0 | -2.337094 | -1.553980 | -0.617274 |
| 25 | 6 | 0 | 5.086942  | 0.605470  | 0.943582  |
| 26 | 6 | 0 | 3.635822  | 4.429167  | 0.349378  |
| 27 | 6 | 0 | 0.494299  | 4.090677  | 0.121656  |
| 28 | 6 | 0 | -3.222274 | -2.373898 | 0.000255  |
| 29 | 6 | 0 | -0.851393 | 3.930319  | -0.034758 |
| 30 | 6 | 0 | -4.680610 | -2.131493 | 0.172533  |
| 31 | 6 | 0 | -5.213059 | -3.176552 | 0.873396  |
| 32 | 6 | 0 | -1.957212 | 4.859944  | 0.279728  |
| 33 | 6 | 0 | 4.175398  | -2.929618 | 0.155056  |
| 34 | 6 | 0 | 6.429466  | -0.069541 | 0.933717  |
| 35 | 6 | 0 | -4.113401 | -4.135408 | 1.198264  |
| 36 | 6 | 0 | -3.139557 | 4.221944  | 0.006655  |
| 37 | 6 | 0 | -5.332343 | -0.916455 | -0.329380 |
| 38 | 6 | 0 | -6.603275 | -3.429078 | 1.359417  |
| 39 | 6 | 0 | -2.823659 | 2.841239  | -0.491522 |
| 40 | 6 | 0 | -1.752904 | 6.231715  | 0.845139  |
| 41 | 6 | 0 | -4.530333 | 4.633751  | 0.154299  |
| 42 | 6 | 0 | -6.648583 | -0.814956 | -0.606981 |
| 43 | 6 | 0 | -4.985260 | 5.891891  | 0.340446  |
| 44 | 1 | 0 | 3.339668  | -0.709719 | -1.142697 |
| 45 | 1 | 0 | 3.075701  | -2.962302 | -2.228683 |
| 46 | 1 | 0 | 1.996145  | -4.346676 | -2.082307 |
| 47 | 1 | 0 | 5.568567  | 2.267160  | -0.369096 |
| 48 | 1 | 0 | 5.061680  | 0.808301  | -1.205874 |
| 49 | 1 | 0 | -0.225853 | 0.209328  | -0.441480 |
| 50 | 1 | 0 | -0.861960 | 1.988327  | -0.835429 |
| 51 | 1 | 0 | 3.659311  | -4.859043 | -0.497595 |
| 52 | 1 | 0 | 2.446424  | -4.112975 | 0.542310  |
| 53 | 1 | 0 | -0.549467 | -5.049478 | -0.667937 |
| 54 | 1 | 0 | -1.791108 | -4.265812 | -1.661211 |
| 55 | 1 | 0 | -0.240054 | -4.717925 | -2.371095 |
| 56 | 1 | 0 | -2.712336 | -0.594982 | -0.971040 |
| 57 | 1 | 0 | 5.038484  | 1.248992  | 1.832378  |
| 58 | 1 | 0 | 4.307252  | -0.152147 | 1.062827  |
| 59 | 1 | 0 | 3.403769  | 5.252665  | -0.336404 |
| 60 | 1 | 0 | 4.719741  | 4.282690  | 0.334751  |
| 61 | 1 | 0 | 3.357138  | 4.751820  | 1.359992  |
| 62 | 1 | 0 | 0.871124  | 5.044433  | 0.476221  |
| 63 | 1 | 0 | -2.037469 | -4.011389 | 0.740427  |
| 64 | 1 | 0 | -4.701833 | -0.041213 | -0.483341 |
| 65 | 1 | 0 | -6.576205 | -4.157504 | 2.175053  |
| 66 | 1 | 0 | -7.072382 | -2.503280 | 1.711488  |
| 67 | 1 | 0 | -7.238212 | -3.845270 | 0.567823  |
| 68 | 1 | 0 | -2.471820 | 6.425405  | 1.649132  |
| 69 | 1 | 0 | -1.898531 | 7.001504  | 0.077905  |
| 70 | 1 | 0 | -0.745585 | 6.350443  | 1.252694  |
| 71 | 1 | 0 | -5.244230 | 3.814555  | 0.081039  |
| 72 | 1 | 0 | 5.155855  | -2.342790 | 1.757226  |
| 73 | 1 | 0 | 7.382848  | -1.559083 | 1.820125  |
| 74 | 1 | 0 | -7.063047 | 0.122610  | -0.963557 |
| 75 | 1 | 0 | -7.331984 | -1.653796 | -0.517146 |
| 76 | 1 | 0 | -6.048357 | 6.084380  | 0.441777  |

77      1      0    -4.330109   6.756344   0.370106

-----  
# opt freq 6-311+g(2d,p) m062x  
-----

Standard orientation:

| Center<br>Number | Atomic<br>Number | Atomic<br>Type | Coordinates (Angstroms) |           |           |
|------------------|------------------|----------------|-------------------------|-----------|-----------|
|                  |                  |                | X                       | Y         | Z         |
| 1                | 8                | 0              | 4.304085                | -3.014868 | 1.484164  |
| 2                | 8                | 0              | 6.450766                | -1.036959 | 1.870579  |
| 3                | 8                | 0              | 4.789068                | -2.170973 | -0.521412 |
| 4                | 8                | 0              | 7.306733                | 0.203075  | 0.217606  |
| 5                | 8                | 0              | -3.994585               | -5.203711 | 1.931344  |
| 6                | 8                | 0              | -3.707708               | 2.138104  | -0.826735 |
| 7                | 7                | 0              | -0.075162               | -0.776753 | -0.766472 |
| 8                | 7                | 0              | 1.053155                | 1.788979  | -0.487025 |
| 9                | 7                | 0              | -2.866203               | -3.662046 | 0.628836  |
| 10               | 7                | 0              | -1.525829               | 2.811304  | -0.491232 |
| 11               | 6                | 0              | 1.201590                | -2.529469 | -1.286061 |
| 12               | 6                | 0              | 1.217190                | -1.151108 | -1.021804 |
| 13               | 6                | 0              | 3.377946                | 1.943077  | -0.367710 |
| 14               | 6                | 0              | 2.236499                | 1.083159  | -0.645922 |
| 15               | 6                | 0              | -0.137339               | -2.965141 | -1.180930 |
| 16               | 6                | 0              | 2.861645                | 3.159728  | -0.036086 |
| 17               | 6                | 0              | -0.911140               | -1.842315 | -0.838855 |
| 18               | 6                | 0              | 2.306304                | -0.248808 | -0.950436 |
| 19               | 6                | 0              | 2.386756                | -3.388015 | -1.618546 |
| 20               | 6                | 0              | 1.408167                | 3.014067  | -0.137392 |
| 21               | 6                | 0              | 4.791631                | 1.451128  | -0.333107 |
| 22               | 6                | 0              | 3.127219                | -3.911170 | -0.375715 |
| 23               | 6                | 0              | -0.651141               | -4.333040 | -1.517503 |
| 24               | 6                | 0              | -2.333741               | -1.638578 | -0.641925 |
| 25               | 6                | 0              | 5.047016                | 0.640609  | 0.943446  |
| 26               | 6                | 0              | 3.571349                | 4.410589  | 0.373028  |
| 27               | 6                | 0              | 0.455647                | 4.065288  | 0.136257  |
| 28               | 6                | 0              | -3.177004               | -2.467598 | 0.001193  |
| 29               | 6                | 0              | -0.884371               | 3.935755  | -0.012106 |
| 30               | 6                | 0              | -4.628160               | -2.260079 | 0.196173  |
| 31               | 6                | 0              | -5.112501               | -3.289327 | 0.928431  |
| 32               | 6                | 0              | -1.935168               | 4.911802  | 0.320756  |
| 33               | 6                | 0              | 4.145390                | -2.932532 | 0.160921  |
| 34               | 6                | 0              | 6.377849                | -0.054723 | 0.925597  |
| 35               | 6                | 0              | -3.980661               | -4.203070 | 1.253008  |
| 36               | 6                | 0              | -3.136351               | 4.351784  | 0.033425  |
| 37               | 6                | 0              | -5.328135               | -1.085006 | -0.322434 |
| 38               | 6                | 0              | -6.477263               | -3.560023 | 1.455635  |
| 39               | 6                | 0              | -2.893892               | 2.969842  | -0.486048 |
| 40               | 6                | 0              | -1.653849               | 6.247409  | 0.922255  |
| 41               | 6                | 0              | -4.495715               | 4.843775  | 0.184338  |
| 42               | 6                | 0              | -6.607044               | -1.084865 | -0.703381 |
| 43               | 6                | 0              | -4.866275               | 6.127356  | 0.208215  |
| 44               | 1                | 0              | 3.289009                | -0.679132 | -1.113676 |
| 45               | 1                | 0              | 3.100700                | -2.842097 | -2.242515 |
| 46               | 1                | 0              | 2.045098                | -4.246839 | -2.202902 |
| 47               | 1                | 0              | 5.500819                | 2.280749  | -0.388599 |

|    |   |   |           |           |           |
|----|---|---|-----------|-----------|-----------|
| 48 | 1 | 0 | 4.996269  | 0.810788  | -1.197833 |
| 49 | 1 | 0 | -0.299178 | 0.154956  | -0.443752 |
| 50 | 1 | 0 | -1.012822 | 2.033795  | -0.879229 |
| 51 | 1 | 0 | 3.702919  | -4.808277 | -0.634064 |
| 52 | 1 | 0 | 2.436091  | -4.189254 | 0.423001  |
| 53 | 1 | 0 | -0.449533 | -5.069291 | -0.729718 |
| 54 | 1 | 0 | -1.729580 | -4.312953 | -1.688365 |
| 55 | 1 | 0 | -0.178723 | -4.707625 | -2.430514 |
| 56 | 1 | 0 | -2.741998 | -0.698348 | -1.002846 |
| 57 | 1 | 0 | 5.026747  | 1.289975  | 1.827185  |
| 58 | 1 | 0 | 4.265771  | -0.109126 | 1.096350  |
| 59 | 1 | 0 | 3.313674  | 5.248289  | -0.283719 |
| 60 | 1 | 0 | 4.655168  | 4.279631  | 0.332572  |
| 61 | 1 | 0 | 3.309424  | 4.703729  | 1.395749  |
| 62 | 1 | 0 | 0.838789  | 5.012834  | 0.497007  |
| 63 | 1 | 0 | -1.932466 | -4.008896 | 0.782095  |
| 64 | 1 | 0 | -4.756583 | -0.161864 | -0.398374 |
| 65 | 1 | 0 | -6.402112 | -4.142867 | 2.376933  |
| 66 | 1 | 0 | -7.014869 | -2.627501 | 1.647884  |
| 67 | 1 | 0 | -7.068027 | -4.150073 | 0.746121  |
| 68 | 1 | 0 | -2.476803 | 6.548609  | 1.575816  |
| 69 | 1 | 0 | -1.542864 | 7.014786  | 0.148382  |
| 70 | 1 | 0 | -0.733320 | 6.229744  | 1.509706  |
| 71 | 1 | 0 | -5.251757 | 4.064406  | 0.249080  |
| 72 | 1 | 0 | 5.013533  | -2.393053 | 1.735539  |
| 73 | 1 | 0 | 7.342743  | -1.410153 | 1.809937  |
| 74 | 1 | 0 | -7.072959 | -0.176712 | -1.068857 |
| 75 | 1 | 0 | -7.211476 | -1.985732 | -0.688392 |
| 76 | 1 | 0 | -5.908871 | 6.399911  | 0.325495  |
| 77 | 1 | 0 | -4.156108 | 6.936856  | 0.081078  |

-----
